# Supplementary material for: Oral anticoagulants for prevention of stroke in atrial fibrillation: systematic review, network meta-analysis, and cost effectiveness analysis
Source: PubMed Central journal article supplement (PMC5704695; doi:10.1136/bmj.j5058), 2017-11-28
Supplement: lopj038668.ww3.pdf [file lopj038668.ww3.pdf]

### Appendix 3: Characteristics of 23 included randomised trials in stroke prevention in AF (references below)

| Study<br><br>(Centre type)<br>[Countries]                                                                                                 | Study type<br><br>Sponsor<br>(sponsor's role)                                                                                                                                                                                               | Age<br>eligibility<br>(Mean<br>age)<br>[% Male] | AF type                                             | No.<br>rand. | Interventions<br>compared                                                                                                                                                                                           | Tmt<br>duration<br>(months) | Mean time<br>in<br>therapeutic<br>range (INR) | Outcomes                                                                                                                                                                          | Time of<br>outcome<br>assessment<br>(months) |
|-------------------------------------------------------------------------------------------------------------------------------------------|---------------------------------------------------------------------------------------------------------------------------------------------------------------------------------------------------------------------------------------------|-------------------------------------------------|-----------------------------------------------------|--------------|---------------------------------------------------------------------------------------------------------------------------------------------------------------------------------------------------------------------|-----------------------------|-----------------------------------------------|-----------------------------------------------------------------------------------------------------------------------------------------------------------------------------------|----------------------------------------------|
| <b>ACTIVE W(1)</b><br><br>(Multicentre)<br><br>[North & South<br>America, Europe,<br>Russia, Israel,<br>Australia, Asia,<br>South Africa] | Phase III<br><br>Sanofi -Aventis and<br>Bristol-Myers<br>Squibb<br>(The sponsor<br>contributed to the<br>study design<br>“but had no role in<br>data collection, data<br>analysis, data<br>Interpretation, or<br>writing of the<br>report”) | ≥18 yrs.<br>(70.2 yrs.)<br><br>[66.1%]          | Non-<br>valvular<br><br>ECG<br>diagnosed            | 6706         | <b>Antiplatelet</b><br>1. Clopidogrel<br>75mg + (aspirin 75-<br>100mg) od<br><br><b>Warfarin</b><br>2. INR 2-3 (some<br>patients may have<br>received other<br>vitamin K<br>antagonists in use<br>in their country) | Not<br>given                | 63.8%                                         | Efficacy-All stroke,<br>ischemic stroke,<br>haemorrhagic stroke,<br>MI<br><br>Safety-All bleeding,<br>major bleeding,<br>minor bleeding, fatal<br>bleeding, death (all<br>causes) | 15.4                                         |
| <b>AFASAK(2)</b><br><br>(Two centres)<br><br>[Denmark]                                                                                    | Phase III<br><br>NycoMed AS,<br>Oslo, Norway;<br>Henrik Henriksen's<br>Foundation;<br>Kathrine and Vigo<br>Skovgaard's<br>Foundation; and<br>Danish Medical<br>Research<br>Foundation<br>(Not stated)                                       | ≥18 yrs.<br>(74.2 yrs.)<br><br>[53.6%]          | Chronic<br>non-<br>valvular<br><br>ECG<br>diagnosed | 1007         | <b>Warfarin</b><br>1. INR 2-3<br><br><b>Antiplatelet<br/>(aspirin)</b><br>2. 75mg od<br><br>3. Placebo od                                                                                                           | 24                          | 73%                                           | Efficacy-All stroke,<br>fatal stroke, minor<br>ischemic stroke, TIA<br><br>Safety-Bleeding,<br>death (all causes)                                                                 | 24                                           |

|                            |                                                                                                                                                                                                           |                         |                                     |     |                                                                                              |    |     |                                                                                                               |                      |
|----------------------------|-----------------------------------------------------------------------------------------------------------------------------------------------------------------------------------------------------------|-------------------------|-------------------------------------|-----|----------------------------------------------------------------------------------------------|----|-----|---------------------------------------------------------------------------------------------------------------|----------------------|
| <b>AFASAK II(3)</b>        | Phase III                                                                                                                                                                                                 | ≥18 yrs.<br>(74.2 yrs.) | Chronic non-valvular                | 677 | <b>Warfarin</b>                                                                              | 42 |     | Efficacy-All stroke, ischemic stroke, haemorrhagic stroke, fatal stroke, stroke or systemic embolism, TIA, MI | 42                   |
| (Single centre)            | The Danish Heart Foundation,                                                                                                                                                                              | [60%]                   | ECG diagnosed                       |     | 1. 1.25mg/day fixed dose<br>2. 1.25mg/day fixed dose plus aspirin 300mg/day od<br>3. INR 2-3 |    | 73% |                                                                                                               |                      |
| [Denmark]                  | Copenhagen; Nycomed DAK A/S Roskilde, Denmark; Du Pont Pharma, Wilmington, Del; The Danish Foundation for Medical Research for the Region of Copenhagen; and many other non-industry funders (Not stated) |                         |                                     |     | <b>Aspirin</b><br>4. 300mg od                                                                |    |     | Safety-Major bleeding, minor bleeding, intracranial bleeding, death (all causes)                              |                      |
| <b>AF-ASA-VKA-CHINA(4)</b> | Phase III                                                                                                                                                                                                 | ≥80 yrs.<br>(NR)        | Persistent & Permanent non-valvular | 110 | <b>Warfarin</b>                                                                              | 24 | NR  | Efficacy-Stroke or systemic embolism, ischemic stroke, MI                                                     | 1, 6, 12, 18, and 24 |
| (Two centres)              | Grant from talent pool subject of Shanghai Shi Dong Hospital                                                                                                                                              | [NR]                    | Confirmed by the case history & ECG |     | <b>Antiplatelet (aspirin)</b><br>2. 100mg od                                                 |    |     | Safety-All bleeding, major bleeding, minor bleeding, fatal bleeding, death (all causes)                       |                      |
| [China]                    | (Not applicable)                                                                                                                                                                                          |                         |                                     |     |                                                                                              |    |     |                                                                                                               |                      |

|                              |                                                                                                                                                                                      |                                      |                                                                       |     |                                                                                                                          |                                               |                                                                                                                         |                                                                                                                                                                 |   |
|------------------------------|--------------------------------------------------------------------------------------------------------------------------------------------------------------------------------------|--------------------------------------|-----------------------------------------------------------------------|-----|--------------------------------------------------------------------------------------------------------------------------|-----------------------------------------------|-------------------------------------------------------------------------------------------------------------------------|-----------------------------------------------------------------------------------------------------------------------------------------------------------------|---|
| <b>AF-DABIG-VKA-JAPAN(5)</b> | Phase II<br>Boehringer<br>Ingelheim<br>(The sponsor was involved in the trial)                                                                                                       | ≥20 yrs.<br>(NR)<br>[NR]             | Paroxysmal, persistent or permanent non-valvular<br><br>ECG diagnosed | 174 | <b>Dabigatran</b><br>1. 110mg bd<br>2. 150mg bd<br><br><b>Warfarin</b><br>3. INR 2-3 (INR ≥1.6 to ≤2.6 in ≥70 yrs.)      | 3<br><br><br>NR                               | Efficacy-Stroke or systemic embolism<br><br>Safety-All bleeding, major bleeding, composite clinically relevant bleeding | 3                                                                                                                                                               |   |
| <b>AF-EDOX-VKA-ASIA(6)</b>   | Phase II<br>Daiichi Sankyo Co., Ltd., Tokyo, Japan<br>(The sponsor had influence on the study design, data management & analysis, and key decisions)                                 | 18-80 yrs.<br>(65.1 yrs.)<br>[65.4%] | Non-valvular<br><br>ECG diagnosed<br><br>CHADS <sub>2</sub> ≥ 1       | 235 | <b>Edoxaban</b><br>1. 30mg od<br>2. 60mg od<br><br><b>Warfarin</b><br>3. INR 2-3                                         | 3<br>(Edoxaban)<br><br>6<br>(Warfarin)        | 45.1%                                                                                                                   | Efficacy-Stroke or systemic embolism<br><br>Safety-All bleeding, major bleeding, minor bleeding, clinically relevant non-major bleeding                         | 3 |
| <b>AF-EDOX-VKA-JAPAN(7)</b>  | Phase II<br>Daiichi Sankyo Co., Ltd., Tokyo, Japan<br>(The funder “had input on the study design and data analysis & interpretation of results and wrote the clinical study report”) | ≥20 yrs.<br>(NR)<br>[NR]             | Non-valvular<br><br>ECG diagnosed<br><br>CHADS <sub>2</sub> ≥ 1       | 536 | <b>Edoxaban</b><br>1. 30mg od<br>2. 45mg od<br>3. 60mg od<br><br><b>Warfarin</b><br>4. INR 2-3 (INR 1.6-2.6 in ≥70 yrs.) | 3<br><br><br>83% (≥70 yrs.)<br>73% (<70 yrs.) |                                                                                                                         | Efficacy-Stroke or systemic embolism<br><br>Safety-All bleeding, major bleeding, clinically relevant non-major bleeding, composite clinically relevant bleeding | 3 |

|                             |                                                                        |                                      |                                                                                  |      |                                                                                                              |                 |       |                                                                                                                                                                                                                                 |    |
|-----------------------------|------------------------------------------------------------------------|--------------------------------------|----------------------------------------------------------------------------------|------|--------------------------------------------------------------------------------------------------------------|-----------------|-------|---------------------------------------------------------------------------------------------------------------------------------------------------------------------------------------------------------------------------------|----|
| <b>AF-EDOX-VKA-MULTI(8)</b> | Phase II<br>Daiichi Sankyo Co., Ltd., Tokyo, Japan (Not clear)         | 18-85 yrs.<br>(65.1 yrs.)<br>[62.1%] | Persistent non-valvular<br>ECG diagnosed<br>CHADS <sub>2</sub> ≤2                | 1146 | <b>Edoxaban</b><br>1. 30mg od<br>2. 60mg od<br>3. 30mg bd<br>4. 60mg bd<br><br><b>Warfarin</b><br>5. INR 2-3 | 3               | 49.7% | Efficacy-Stroke or systemic embolism, MI, hospital admission<br><br>Safety-All bleeding, major bleeding, minor bleeding, clinically relevant non-major Bleed, composite clinically relevant bleeding, death<br>(cardiovascular) | 3  |
| <b>AF-VKA-ASA-CHINA(9)</b>  | Phase III<br>10th National Five-year Project of China (Not applicable) | 50-80 yrs.<br>(NR)<br>[NR]           | Non-valvular<br>Diagnosis based on medical history, ECG and/or Holter recordings | 690  | <b>Warfarin</b><br>1. INR 2.1-2.5<br>2. INR 1.6-2<br><br><b>Antiplatelet (aspirin)</b><br>3. 200mg od        | 24<br>(mean 15) | NR    | Efficacy-All stroke, ischemic stroke, haemorrhagic stroke, TIA<br><br>Safety-Major bleeding, minor bleeding, death (all causes)                                                                                                 | 24 |

|                         |                                                                                                                                                                                                                            |                                         |                                                                                      |           |                                                                                                         |                           |                                                                                                                                                                                                                            |                                            |
|-------------------------|----------------------------------------------------------------------------------------------------------------------------------------------------------------------------------------------------------------------------|-----------------------------------------|--------------------------------------------------------------------------------------|-----------|---------------------------------------------------------------------------------------------------------|---------------------------|----------------------------------------------------------------------------------------------------------------------------------------------------------------------------------------------------------------------------|--------------------------------------------|
| <b>ARISTOTLE(10-20)</b> | Phase III<br>Bristol-Myers Squibb and Pfizer<br>(The trial was designed in conjunction with the sponsors & “The primary analyses were performed both at Bristol-Myers Squibb and at the Duke Clinical Research Institute”) | ≥18 yrs.<br>(Median 70 yrs.)<br>[64.7%] | Non-valvular or flutter<br>ECG diagnosed                                             | 1820<br>1 | <b>Apixaban</b><br>1. 5mg bd<br><b>Warfarin</b><br>2. INR 2-3                                           | 21.6<br>(median)<br>62.2% | Efficacy-All stroke, ischemic stroke, haemorrhagic stroke, stroke or systemic embolism, MI<br><br>Safety-All bleeding, major bleeding, composite clinically relevant bleeding, intracranial bleeding, death (all causes)   | 21.6<br>(median for Intracranial bleeding) |
| <b>ARISTOTLE-J(21)</b>  | Phase II<br>Pfizer Inc. and Bristol-Myers Squibb<br>(Not clear)                                                                                                                                                            | ≥20 yrs.<br>(70.3 yrs.)<br>[82.9%]      | Non-valvular<br>Diagnosis based on ECG, Holter recording or intracardiac electrogram | 222       | <b>Apixaban</b><br>1. 2.5mg bd<br>2. 5mg bd<br><b>Warfarin</b><br>3. INR 2-3<br>(INR 2-2.6 in ≥70 yrs.) | 3<br>60%                  | Efficacy-Stroke or systemic embolism, ischaemic stroke, TIA<br><br>Safety-All bleeding, major bleeding, minor bleeding, clinically relevant non-major bleeding, composite clinically relevant bleeding, death (all causes) | 3                                          |

|                        |                                                                                                                      |                                        |                                                     |      |                                                                                                                                |                |                                                                                                                                                                                                                                                                     |                |
|------------------------|----------------------------------------------------------------------------------------------------------------------|----------------------------------------|-----------------------------------------------------|------|--------------------------------------------------------------------------------------------------------------------------------|----------------|---------------------------------------------------------------------------------------------------------------------------------------------------------------------------------------------------------------------------------------------------------------------|----------------|
| <b>AVERROES(22-25)</b> | Phase III<br><br>(Multicentre)<br><br>[North & South America, Europe, Russia, Israel, Australia, Asia, South Africa] | ≥50 yrs.<br>(70 yrs.)<br><br>[58.5%]   | Non-valvular<br><br>ECG diagnosed                   | 5599 | <b>Apixaban</b><br>1. 5mg bd<br>(2.5mg if >80 yrs./≤60 kg/renal status)<br><br><b>Antiplatelet (aspirin)</b><br>2. 81-324mg od | 13.1<br>(mean) | Efficacy-All stroke, stroke or systemic embolism, ischaemic stroke, haemorrhagic stroke, MI<br><br>Safety-Major bleeding, minor bleeding, clinically relevant non-major bleeding, intracranial bleeding, fatal bleeding, death (cardiovascular), death (all causes) | 13.1<br>(mean) |
| <b>BAFTA(26)</b>       | Phase III<br><br>(Multicentre)<br><br>[UK]                                                                           | ≥75 yrs.<br>(81.5 yrs.)<br><br>[54.6%] | Non-valvular or atrial flutter<br><br>ECG diagnosed | 973  | <b>Antiplatelet (aspirin)</b><br>1. 75mg od<br><br><b>Warfarin</b><br>2. INR 2-3                                               | 32.4<br>(mean) | Efficacy-All stroke, MI<br><br>Safety-Major bleeding, death (all causes)                                                                                                                                                                                            | 32.4<br>(mean) |

|                                                                                                                                                              |                                                                         |                                          |                                                                          |           |                                                                                                                        |                                   |                                                                                                                                                                                                                                                                                                                                                                       |                     |
|--------------------------------------------------------------------------------------------------------------------------------------------------------------|-------------------------------------------------------------------------|------------------------------------------|--------------------------------------------------------------------------|-----------|------------------------------------------------------------------------------------------------------------------------|-----------------------------------|-----------------------------------------------------------------------------------------------------------------------------------------------------------------------------------------------------------------------------------------------------------------------------------------------------------------------------------------------------------------------|---------------------|
| <b>Chinese<br/>ATAFS(27)</b><br><br>(Multicentre)<br><br>[China]                                                                                             | Phase III<br><br>Not disclosed                                          | 40-80 yrs.<br>(63.3 yrs.)<br><br>[59.7%] | Non-<br>valvular                                                         | 704       | <b>Antiplatelet<br/>(aspirin)</b><br>1. 150-160mg od<br><br><b>Warfarin</b><br>2. INR 2-3 (INR<br>1.6-2.5 in >75 yrs.) | Not<br>reported<br><br><br>NR     | Efficacy-All stroke<br><br>Safety-Death (all<br>causes)                                                                                                                                                                                                                                                                                                               | 2-24<br>(median=19) |
| <b>ENGAGE AF-<br/>TIMI 48(28, 29)</b><br><br>(Multicentre)<br><br>[North & South<br>America, Europe,<br>Russia, Israel,<br>Australia, Asia,<br>South Africa] | Phase III<br><br>Daiichi Sankyo<br>Pharma<br>Development<br>(Not clear) | ≥21 yrs.<br>(NR)<br><br>[61.9%]          | Non-<br>valvular<br><br>ECG<br>diagnosed<br><br>CHADS <sub>2</sub><br>≥2 | 2110<br>5 | <b>Edoxaban</b><br>1. 30mg od<br>2. 60mg od<br><br><b>Warfarin</b><br>3. INR 2-3                                       | 29.8<br>(median)<br><br><br>64.9% | Efficacy-All stroke,<br>ischemic stroke,<br>haemorrhagic stroke,<br>fatal stroke, stroke or<br>systemic embolism,<br>MI<br><br>Safety-Major<br>bleeding, minor<br>bleeding, fatal<br>bleeding, intracranial<br>bleeding, clinically<br>relevant non-major<br>bleeding, composite<br>clinically relevant<br>bleeding, death<br>(cardiovascular),<br>death (all causes) | 29.8<br>(median)    |

|                         |                                                                           |                         |                                                                                    |      |                                                             |               |                                                                                                                                                         |               |
|-------------------------|---------------------------------------------------------------------------|-------------------------|------------------------------------------------------------------------------------|------|-------------------------------------------------------------|---------------|---------------------------------------------------------------------------------------------------------------------------------------------------------|---------------|
| <b>EXPLORE-Xa(30)</b>   | Phase II                                                                  | ≥18 yrs.<br>(73 yrs.)   | New or existing non-valvular or atrial flutter                                     | 508  | <b>Betrixaban</b><br>1. 40mg od<br>2. 60mg od<br>3. 80mg od | 4.9<br>(mean) | Efficacy-All stroke                                                                                                                                     | 4.9<br>(mean) |
| (Multicentre)           | Portola Pharmaceuticals, South San Francisco, CA, USA                     | [66.5%]                 | Diagnosed by Holter, ECG, rhythm strip, pacemaker, or other intracardiac recording |      | <b>Warfarin</b><br>4. INR 2-3                               | 63.4%         | Safety-All bleeding, major bleeding, minor bleeding, clinically relevant non-major bleeding, composite clinically relevant bleeding, death (all causes) |               |
| [USA, Canada & Germany] | (Not stated)                                                              |                         |                                                                                    |      |                                                             |               |                                                                                                                                                         |               |
| <b>J-ROCKET AF(31)</b>  | Phase III                                                                 | ≥20 yrs.<br>(71.1 yrs.) | Non-valvular                                                                       | 1280 | <b>Rivaroxaban</b><br>1. 15mg od                            | 30            | Efficacy-All stroke, ischemic stroke, haemorrhagic stroke, stroke or systemic embolism, MI                                                              | 30            |
| (Multicentre)           | Bayer Yakuhin Ltd                                                         | [80.6%]                 | ECG diagnosed                                                                      |      | <b>Warfarin</b><br>2. INR 2-3<br>(INR 1.6-2.6 in ≥70 yrs.)  | 65%           | Safety-Composite clinically relevant bleeding, death (cardiovascular), death (all causes)                                                               |               |
| [Japan]                 | (The funder was “responsible for trial design and study data collection”) |                         |                                                                                    |      |                                                             |               |                                                                                                                                                         |               |



|                                            |                                                                                                                                                                                                                                               |                         |                                                                                                           |      |                                                                                                                                                                                                                                                                                  |                |       |                                                                                      |                |
|--------------------------------------------|-----------------------------------------------------------------------------------------------------------------------------------------------------------------------------------------------------------------------------------------------|-------------------------|-----------------------------------------------------------------------------------------------------------|------|----------------------------------------------------------------------------------------------------------------------------------------------------------------------------------------------------------------------------------------------------------------------------------|----------------|-------|--------------------------------------------------------------------------------------|----------------|
| <b>PATAF(32)</b>                           | Phase III                                                                                                                                                                                                                                     | ≥60 yrs.<br>(74.8 yrs.) | Chronic or<br>intermittent                                                                                | 729  | <b>Warfarin</b><br>1. INR <2<br>2. INR 2.5-3.5<br>(some patients<br>received other<br>coumarins –<br>phenprocoumon or<br>acenocoumarol)                                                                                                                                          | 32.4<br>(mean) | NR    | Efficacy-All stroke,<br>ischaemic stroke,<br>arterial event                          | 32.4<br>(mean) |
| (Multicentre)                              | Prevention fund<br>(grant 002817010),                                                                                                                                                                                                         | [44.9%]                 | ECG<br>diagnosed                                                                                          |      | <b>Antiplatelet<br/>(aspirin)</b><br>3. 150mg od                                                                                                                                                                                                                                 |                |       | Safety-Death<br>(cardiovascular),<br>death (all causes)                              |                |
| [Netherlands]                              | Zorg Onder-zoek<br>Nederland; Roche<br>Nicholas BV,<br>Bladel, Holland,<br>donated aspirin<br>(Not stated)                                                                                                                                    |                         |                                                                                                           |      |                                                                                                                                                                                                                                                                                  |                |       |                                                                                      |                |
| <b>PETRO(33)</b>                           | Phase II                                                                                                                                                                                                                                      | ≥18 yrs.<br>(69.5 yrs.) | Permanent,<br>persistent,<br>&<br>paroxysmal<br>non-<br>valvular<br>with<br>coronary<br>artery<br>disease | 502* | <b>Dabigatran</b><br>1. 50mg bd<br>2. 50mg + (aspirin<br>81mg) bd<br>3. 50mg + (aspirin<br>325mg) bd<br>4. 150mg bd<br>5. 150mg + (aspirin<br>81mg) bd<br>6. 150mg + (aspirin<br>325mg) bd<br>7. 300mg bd<br>8. 300mg + (aspirin<br>81mg) bd<br>9. 300mg + (aspirin<br>325mg) bd | 3              |       | Efficacy-Stroke or<br>Systemic embolism                                              | 3              |
| (Multicentre)                              | Boehringer<br>Ingelheim<br>Pharmaceuticals,<br>Biberach, Germany<br>(The funder was<br>responsible for the<br>statistical analysis<br>conducted<br>according to a<br>prospectively<br>designed plan<br>approved by the<br>steering committee) | [81.9%]                 | Diagnosis<br>not<br>explained                                                                             |      | <b>Warfarin</b><br>10. INR 2-3                                                                                                                                                                                                                                                   |                | 57.2% | Safety-All bleeding,<br>major bleeding,<br>composite clinically<br>relevant bleeding |                |
| [USA, Denmark,<br>Netherlands &<br>Sweden] |                                                                                                                                                                                                                                               |                         |                                                                                                           |      |                                                                                                                                                                                                                                                                                  |                |       |                                                                                      |                |

|                                                                                                            |                                                                                                               |                                 |                                   |           |                                                 |                  |                                                                                                                                                                                          |                  |
|------------------------------------------------------------------------------------------------------------|---------------------------------------------------------------------------------------------------------------|---------------------------------|-----------------------------------|-----------|-------------------------------------------------|------------------|------------------------------------------------------------------------------------------------------------------------------------------------------------------------------------------|------------------|
| <b>RE-LY(34, 35)</b>                                                                                       | Phase III                                                                                                     | ≥18 yrs.<br>(71 yrs.)           | Non-<br>valvular                  | 1811<br>3 | <b>Dabigatran</b><br>1. 110mg bd<br>2. 150mg bd | 24<br>(mean)     | Efficacy-Stroke or<br>systemic embolism,<br>ischaemic stroke,<br>haemorrhagic stroke,<br>MI, PE, Hospital<br>admission                                                                   | 24<br>(mean)     |
| (Multicentre)                                                                                              | Boehringer<br>Ingelheim                                                                                       | [63.6%]                         | ECG<br>diagnosed                  |           | <b>Warfarin</b><br>3. INR 2-3                   | 64%              |                                                                                                                                                                                          |                  |
| [North & South<br>America, Europe,<br>Russia, Israel,<br>Australia, Asia,<br>South Africa]                 | (The sponsor<br>contributed in the<br>design, conduct,<br>and reporting of the<br>study)                      |                                 | Mean<br>CHADS <sub>2</sub><br>2.1 |           |                                                 |                  | Safety-Major<br>bleeding, minor<br>bleeding, intracranial<br>bleeding, extra-<br>cranial minor<br>bleeding, death<br>(cardiovascular),<br>death (all causes)                             |                  |
| <b>ROCKET<br/>AF(36-39)</b>                                                                                | Phase III                                                                                                     | ≥18 yrs.<br>(Median<br>73 yrs.) | Non-<br>valvular                  | 1426<br>4 | <b>Rivaroxaban</b><br>1. 20mg od                | 19.4<br>(median) | Efficacy-All stroke,<br>stroke or systemic<br>embolism, MI                                                                                                                               | 19.4<br>(median) |
| (Multicentre)                                                                                              | Johnson & Johnson<br>and Bayer                                                                                | [60.3%]                         | ECG<br>diagnosed                  |           | <b>Warfarin</b><br>2. INR 2-3                   | 55%              | Safety-Major<br>bleeding, clinically<br>relevant non-major<br>bleeding, composite<br>clinically relevant<br>bleeding, fatal<br>bleeding, intracranial<br>bleeding, death (all<br>causes) |                  |
| [North & South<br>America, Europe,<br>Russia, Israel,<br>Australia, New<br>Zealand, Asia,<br>South Africa] | (The sponsor was<br>not involved in the<br>coordination of the<br>trial, data<br>management, and<br>analyses) |                                 | CHADS <sub>2</sub><br>≥2          |           |                                                 |                  |                                                                                                                                                                                          |                  |

|                    |                                                                                                                          |                                          |                               |      |                                                                                                   |                                                  |       |                                                                          |                |
|--------------------|--------------------------------------------------------------------------------------------------------------------------|------------------------------------------|-------------------------------|------|---------------------------------------------------------------------------------------------------|--------------------------------------------------|-------|--------------------------------------------------------------------------|----------------|
| <b>SPAF II(40)</b> | Phase III                                                                                                                | Not clear<br>(NR)                        | Non-<br>valvular              | 1100 | <b>Warfarin</b><br>1. INR 2-4.5 in <75<br>yrs.<br>2. INR 2.0-4.5 in<br>>75 yrs.                   | 37.2<br>(mean<br>for age<br><75<br>>75<br>years) | NR    | Efficacy-Stroke or<br>systemic embolism,<br>ischaemic stroke, MI,<br>TIA | 27.6<br>(mean) |
| (Multicentre)      | The Division of<br>Stroke and Trauma,<br>National Institute of<br>Neurological<br>Disorders and<br>Stroke<br>(Not clear) | [NR]                                     |                               |      | <b>Antiplatelet<br/>(aspirin)</b><br>3. 325mg (in <75<br>yrs.) od<br>4. 325mg (in >75<br>yrs.) od | 24<br>(mean<br>for age<br>>75<br>years)          |       | Safety-Intracranial<br>bleeding, death (all<br>causes)                   |                |
| [USA]              |                                                                                                                          |                                          |                               |      |                                                                                                   |                                                  |       |                                                                          |                |
| <b>WASPO(41)</b>   | Phase III                                                                                                                | >80 & <90<br>yrs.<br>(Median<br>83 yrs.) | Permanent<br>non-<br>valvular | 75   | <b>Warfarin</b><br>1. INR 2-3                                                                     | 12                                               | 69.2% | Efficacy-All stroke,<br>TIA                                              | 12             |
| (Multicentre)      | Not declared                                                                                                             |                                          |                               |      | <b>Antiplatelet<br/>(aspirin)</b><br>2. 300mg od                                                  |                                                  |       | Safety-Death (all<br>causes)                                             |                |
| [UK]               |                                                                                                                          | [47%]                                    | ECG<br>diagnosed              |      |                                                                                                   |                                                  |       |                                                                          |                |

AF = atrial fibrillation; NVAF = non-valvular atrial fibrillation; MI = myocardial infarction; TIA = transient ischaemic attack; PE = pulmonary embolism; INR = international normalized ratio; ECG = electrocardiogram; rand = randomised; od = once daily; bd = twice daily; Tmt = treatment; NR = not reported.

\*Our results are based on 515 patients as reported in the results tables; the trial report is inconsistent in this regard.

## References of the included trials

1. Connolly S, Pogue J, Hart R, et al. Clopidogrel plus aspirin versus oral anticoagulation for atrial fibrillation in the Atrial fibrillation Clopidogrel Trial with Irbesartan for prevention of Vascular Events (ACTIVE W): a randomised controlled trial. *Lancet* 2006;367(9526):1903-12.
2. Petersen P, Boysen G, Godtfredsen J, Andersen ED, Andersen B. Placebo-controlled, randomised trial of warfarin and aspirin for prevention of thromboembolic complications in chronic atrial fibrillation. The Copenhagen AFASAK study. *Lancet* 1989;1(8631):175-9.
3. Gullov AL, Koefoed BG, Petersen P, et al. Fixed minidose warfarin and aspirin alone and in combination vs adjusted-dose warfarin for stroke prevention in atrial fibrillation: Second Copenhagen Atrial Fibrillation, Aspirin, and Anticoagulation Study. *Arch Intern Med* 1998;158(14):1513-21.
4. Liu X, Huang H, Yu J, et al. Warfarin compared with aspirin for older Chinese patients with stable coronary heart diseases and atrial fibrillation complications. *Int J Clin Pharmacol Ther* 2014;52(6):454-9.
5. Boehringer Ingelheim. A dose response study of dabigatran etexilate (BIBR 1048) in pharmacodynamics and safety in patients with non-valvular atrial fibrillation in comparison to warfarin NCT01136408. 2014.
6. Chung N, Jeon HK, Lien LM, et al. Safety of edoxaban, an oral factor Xa inhibitor, in Asian patients with non-valvular atrial fibrillation. *Thromb Haemost* 2011;105(3):535-44.
7. Yamashita T, Koretsune Y, Yasaka M, et al. Randomized, multicenter, warfarin-controlled phase II study of edoxaban in Japanese patients with non-valvular atrial fibrillation. *Circ J* 2012;76(8):1840-7.
8. Weitz JI, Connolly SJ, Patel I, et al. Randomised, parallel-group, multicentre, multinational phase 2 study comparing edoxaban, an oral factor Xa inhibitor, with warfarin for stroke prevention in patients with atrial fibrillation. *Thromb Haemost* 2010;104(3):633-41.
9. Chen KP, Huang CX, Huang DJ, et al. Anticoagulation therapy in Chinese patients with non-valvular atrial fibrillation: a prospective, multi-center, randomized, controlled study. *Chin Med J* 2012;125(24):4355-60.
10. Lopes RD, Alexander JH, Al-Khatib SM, et al. Apixaban for reduction in stroke and other Thromboembolic events in atrial fibrillation (ARISTOTLE) trial: design and rationale. *Am Heart J* 2010;159(3):331-9.
11. Granger CB, Alexander JH, McMurray JJ, et al. Apixaban versus warfarin in patients with atrial fibrillation. *N Engl J Med* 2011;365(11):981-92.
12. Easton JD, Lopes RD, Bahit MC, et al. Apixaban compared with warfarin in patients with atrial fibrillation and previous stroke or transient ischaemic attack: a subgroup analysis of the ARISTOTLE trial. *Lancet Neurol* 2012;11(6):503-11.
13. Hohnloser SH, Hijazi Z, Thomas L, et al. Efficacy of apixaban when compared with warfarin in relation to renal function in patients with atrial fibrillation: insights from the ARISTOTLE trial. *Eur Heart J* 2012;33(22):2821-30.
14. Al-Khatib SM, Thomas L, Wallentin L, et al. Outcomes of apixaban vs. warfarin by type and duration of atrial fibrillation: results from the ARISTOTLE trial. *Eur Heart J* 2013;34(31):2464-71.

15. McMurray JJ, Ezekowitz JA, Lewis BS, et al. Left ventricular systolic dysfunction, heart failure, and the risk of stroke and systemic embolism in patients with atrial fibrillation: insights from the ARISTOTLE trial. *Circ Heart Fail* 2013;6(3):451-60.
16. Flaker GC, Hohnloser S, Wojdyla D, et al. Apixaban is efficacious and safe in patients with atrial fibrillation using concomitant amiodarone: An analysis from the aristotle trial. *J Am Coll Cardiol* 2013;1):E317.
17. Garcia DA, Wallentin L, Lopes RD, et al. Apixaban versus warfarin in patients with atrial fibrillation according to prior warfarin use: results from the Apixaban for Reduction in Stroke and Other Thromboembolic Events in Atrial Fibrillation trial. *Am Heart J* 2013;166(3):549-58.
18. Bahit MC, Lopes RD, Wojdyla DM, et al. Apixaban in patients with atrial fibrillation and prior coronary artery disease: insights from the ARISTOTLE trial. *Int J Cardiol* 2013;170(2):215-20.
19. Alexander JH, Lopes RD, Thomas L, et al. Apixaban vs. warfarin with concomitant aspirin in patients with atrial fibrillation: insights from the ARISTOTLE trial. *Eur Heart J* 2014;35(4):224-32.
20. Hylek E, Held C, Alexander J, et al. Major bleeding in patients with atrial fibrillation receiving apixaban or warfarin: The ARISTOTLE trial (Apixaban for Reduction in Stroke and Other Thromboembolic Events in Atrial Fibrillation): Predictors, characteristics, and clinical outcomes. *J Am Coll Cardiol* 2014;63(20):2141-7.
21. Ogawa S, Shinohara Y, Kanmuri K. Safety and efficacy of the oral direct factor xa inhibitor apixaban in Japanese patients with non-valvular atrial fibrillation. -The ARISTOTLE-J study. *Circ J* 2011;75(8):1852-9.
22. Eikelboom JW, O'Donnell M, Yusuf S, et al. Rationale and design of AVERROES: apixaban versus acetylsalicylic acid to prevent stroke in atrial fibrillation patients who have failed or are unsuitable for vitamin K antagonist treatment. *Am Heart J* 2010;159(3):348-53.e1.
23. Hohnloser S, Yusuf S, Eikelboom J, et al. Apixaban in patients with atrial fibrillation and their risk for cardiovascular hospitalization: Insights from the AVERROES trial. *Eur Heart J* 2011;32:671.
24. Connolly SJ, Eikelboom J, Joyner C, et al. Apixaban in patients with atrial fibrillation. *N Engl J Med* 2011;364(9):806-17.
25. Diener HC, Eikelboom J, Connolly SJ, et al. Apixaban versus aspirin in patients with atrial fibrillation and previous stroke or transient ischaemic attack: a predefined subgroup analysis from AVERROES, a randomised trial. *Lancet Neurol* 2012;11(3):225-31.
26. Mant J, Hobbs FD, Fletcher K, et al. Warfarin versus aspirin for stroke prevention in an elderly community population with atrial fibrillation (the Birmingham Atrial Fibrillation Treatment of the Aged Study, BAFTA): a randomised controlled trial. *Lancet* 2007;370(9586):493-503.
27. Hu DY, Zhang HP, Sun YH, Jiang LQ. [The randomized study of efficiency and safety of antithrombotic therapy in nonvalvular atrial fibrillation: warfarin compared with aspirin]. *Zhonghua Xin Xue Guan Bing Za Zhi* 2006;34(4):295-8.
28. Ruff CT, Giugliano RP, Antman EM, et al. Evaluation of the novel factor Xa inhibitor edoxaban compared with warfarin in patients with atrial fibrillation: design and rationale for the Effective anticoagulation with factor xA next Generation in Atrial Fibrillation-Thrombolysis In Myocardial Infarction study 48 (ENGAGE AF-TIMI 48). *Am Heart J* 2010;160(4):635-41.
29. Giugliano RP, Ruff CT, Braunwald E, et al. Edoxaban versus warfarin in patients with atrial fibrillation. *N Engl J Med* 2013;369(22):2093-104.

30. Connolly SJ, Eikelboom J, Dorian P, et al. Betrixaban compared with warfarin in patients with atrial fibrillation: results of a phase 2, randomized, dose-ranging study (Explore-Xa). *Eur Heart J* 2013;34(20):1498-505.
31. Hori M, Matsumoto M, Tanahashi N, et al. Rivaroxaban vs. warfarin in Japanese patients with atrial fibrillation - the J-ROCKET AF study. *Circ J* 2012;76(9):2104-11.
32. Hellemons BS, Langenberg M, Lodder J, et al. Primary prevention of arterial thromboembolism in non-rheumatic atrial fibrillation in primary care: randomised controlled trial comparing two intensities of coumarin with aspirin. *BMJ* 1999;319(7215):958-64.
33. Ezekowitz MD, Reilly PA, Nehmiz G, et al. Dabigatran with or without concomitant aspirin compared with warfarin alone in patients with nonvalvular atrial fibrillation (PETRO Study). *Am J Cardiol* 2007;100(9):1419-26.
34. Connolly SJ, Ezekowitz MD, Yusuf S, et al. Dabigatran versus warfarin in patients with atrial fibrillation. *N Engl J Med* 2009;361(12):1139-51.
35. Connolly SJ, Ezekowitz MD, Yusuf S, Reilly PA, Wallentin L. Newly identified events in the RE-LY trial. *N Engl J Med* 2010;363(19):1875-6.
36. Rivaroxaban-Once daily, oral, direct factor Xa inhibition Compared with vitamin K antagonism for prevention of stroke and Embolism Trial in Atrial Fibrillation: Rationale and Design of the ROCKET AF study. *Am Heart J* 2010;159(3):340-7 e1.
37. Patel MR, Mahaffey KW, Garg J, et al. Rivaroxaban versus warfarin in nonvalvular atrial fibrillation. *N Engl J Med* 2011;365(10):883-91.
38. Hankey GJ, Patel MR, Stevens SR, et al. Rivaroxaban compared with warfarin in patients with atrial fibrillation and previous stroke or transient ischaemic attack: a subgroup analysis of ROCKET AF. *Lancet Neurol* 2012;11(4):315-22.
39. Mahaffey KW, Wojdyla D, Hankey GJ, et al. Clinical outcomes with rivaroxaban in patients transitioned from vitamin K antagonist therapy: a subgroup analysis of a randomized trial.[Summary for patients in *Ann Intern Med*. 2013 Jun 18;158(12):I-28; PMID: 23778921]. *Ann Intern Med* 2013;158(12):861-8.
40. Stroke Prevention in Atrial Fibrillation Investigators. Warfarin versus aspirin for prevention of thromboembolism in atrial fibrillation: Stroke Prevention in Atrial Fibrillation II Study. *Lancet* 1994;343(8899):687-91.
41. Rash A, Downes T, Portner R, Yeo WW, Morgan N, Channer KS. A randomised controlled trial of warfarin versus aspirin for stroke prevention in octogenarians with atrial fibrillation (WASPO). *Age Ageing* 2007;36(2):151-6.
