# Supplementary material for: Oral anticoagulants for prevention of stroke in atrial fibrillation: systematic review, network meta-analysis, and cost effectiveness analysis
Source: PubMed Central journal article supplement (PMC5704695; doi:10.1136/bmj.j5058), 2017-11-28
Supplement: lopj038668.ww4.pdf [file lopj038668.ww4.pdf]

#### Appendix 4: Additional outcomes reported by 23 included randomised trials in stroke prevention in AF

| Study              | Study size | Reporting pattern | TIA | Minor ischemic stroke | Major ischemic stroke | Fatal stroke | PE | Hospital admission | Fatal bleeding | EC minor bleeding | Arterial event | CR non-major bleeding | Cardio-vascular deaths |
|--------------------|------------|-------------------|-----|-----------------------|-----------------------|--------------|----|--------------------|----------------|-------------------|----------------|-----------------------|------------------------|
| ACTIVE W           | 6706       | 1                 |     |                       |                       |              |    |                    | 18             |                   |                |                       |                        |
| AF-ASA-VKA-CHINA   | 101        | 2                 |     |                       |                       |              |    |                    | 2              |                   |                |                       |                        |
| AF-DABIG-VKA-JAPAN | 166        | 2                 |     |                       |                       |              |    |                    |                |                   |                |                       |                        |
| AF-EDOX-VKA-ASIA   | 234        | 2                 |     |                       |                       |              |    |                    |                |                   |                | 9                     |                        |
| AF-EDOX-VKA-JAPAN  | 519        | 2                 |     |                       |                       |              |    |                    |                |                   |                | 15                    |                        |
| AF-EDOX-VKA-MULTI  | 1143       | 2                 |     |                       |                       |              |    | 12                 |                |                   |                | 49                    | 8                      |
| AF-VKA-ASA-CHINA   | 440        | 2                 | 13  |                       |                       |              |    |                    |                |                   |                |                       |                        |
| AFASAK             | 671        | 2                 | 2   | 1                     |                       | 4            |    |                    |                |                   |                |                       |                        |
| AFASAK II          | 339        | 1                 | 3   |                       |                       | 2            |    |                    |                |                   |                |                       |                        |
| ARISTOTLE          | 18140      | 3                 |     |                       |                       |              |    |                    |                |                   |                |                       |                        |
| ARISTOTLE-J        | 218        | 2                 | 1   |                       |                       |              |    |                    |                |                   |                | 5                     |                        |
| AVERROES           | 5599       | 1                 |     |                       |                       |              |    |                    | 10             |                   |                | 180                   | 180                    |
| BAFTA              | 973        | 1                 |     |                       |                       |              |    |                    |                |                   |                |                       |                        |
| Chinese ATAFS      | 704        | 2                 |     |                       |                       |              |    |                    |                |                   |                |                       |                        |
| ENGAGE AF-TIMI 48  | 21026      | 2                 |     |                       |                       | 239          |    |                    | 112            |                   |                | 3579                  | 1668                   |
| EXPLORE-Xa         | 508        | 2                 |     |                       |                       |              |    |                    |                |                   |                | 12                    |                        |
| J-ROCKET AF        | 1278       | 2                 |     |                       |                       |              |    |                    |                |                   |                |                       | 8                      |
| PATAF              | 272        | 1                 |     | 2                     | 5                     |              |    |                    |                |                   | 8              |                       | 18                     |
| PETRO              | 515        | 2                 |     |                       |                       |              |    |                    |                |                   |                |                       |                        |
| RE-LY              | 18113      | 2                 |     |                       |                       |              | 43 | 7199               |                | 956               |                |                       | 880                    |
| ROCKET AF          | 14236      | 2                 |     |                       |                       |              |    |                    | 82             |                   |                | 2336                  |                        |
| SPAF II            | 1100       | 3                 | 25  |                       |                       |              |    |                    |                |                   |                |                       |                        |
| WASPO              | 75         | 2                 | 1   |                       |                       |              |    |                    |                |                   |                |                       |                        |
| Total              | 93076      |                   | 45  | 3                     | 5                     | 245          | 43 | 7211               | 224            | 956               | 8              | 6185                  | 2762                   |

TIA: transient ischaemic attack; PE: pulmonary embolism; EC: extracranial; CR: clinically relevant.

Reporting patterns: (1) Number of patients whose first event is of a given type, patients censored thereafter; (2) Number of patients experiencing at least one event of each given type; (3) Total number of events of each type.
