# Supplementary material for: Oral anticoagulants for prevention of stroke in atrial fibrillation: systematic review, network meta-analysis, and cost effectiveness analysis
Source: PubMed Central journal article supplement (PMC5704695; doi:10.1136/bmj.j5058), 2017-11-28
Supplement: lopj038668.ww5.pdf [file lopj038668.ww5.pdf]

## Appendix 5: Risk of bias assessments for each outcome

### A5.0: List of distinct interventions examined by included randomised trials in stroke prevention in AF

- 1 Warfarin (INR 2-3)
  - 2 Warfarin (INR 1.6-3)
  - 3 Warfarin (INR 3-4 od)
  - 4 Antiplatelet (<150mg od)
  - 5 Antiplatelet ( $\geq$ 150mg od)
  - 6 Dabigatran (50mg bd) + Aspirin (81mg bd)
  - 7 Dabigatran (50mg bd) + Aspirin (325mg bd)
  - 8 Dabigatran (150mg bd) + Aspirin (81mg bd)
  - 9 Dabigatran (150mg bd) + Aspirin (325mg bd)
  - 10 Dabigatran (300mg bd) + Aspirin (81mg bd)
  - 11 Dabigatran (300mg bd) + Aspirin (325mg bd)
  - 12 Apixaban (2.5mg bd)
  - 13 Apixaban (5mg bd)
  - 14 Dabigatran (50mg bd)
  - 15 Dabigatran (110mg bd)
  - 16 Dabigatran (150mg bd)
  - 17 Dabigatran (300mg bd)
  - 18 Betrixaban (40mg od)
  - 19 Betrixaban (60mg od)
  - 20 Betrixaban (80mg od)
  - 21 Edoxaban (30mg od)
  - 22 Edoxaban (45mg od)
  - 23 Edoxaban (60mg od)
  - 24 Edoxaban (30mg bd)
  - 25 Edoxaban (60mg bd)
  - 26 Rivaroxaban (15mg od)
  - 27 Rivaroxaban (20mg od)
-

### A5.1: Included trials and risk of bias assessment for stroke or systemic embolism

| Study              | Interventions compared           | Sequence generation | Allocation concealment | Blinding of participants and personnel | Blinding of outcome assessment | Incomplete outcome data | Selective reporting |
|--------------------|----------------------------------|---------------------|------------------------|----------------------------------------|--------------------------------|-------------------------|---------------------|
| ACTIVE W           | 1, 4                             | +                   | +                      | -                                      | +                              | +                       | ?                   |
| AFASAK             | 1, 4                             | +                   | +                      | -                                      | ?                              | +                       | ?                   |
| AFASAK II          | 1, 5                             | +                   | ?                      | -                                      | +                              | +                       | ?                   |
| AF-ASA-VKA-CHINA   | 2, 4                             | ?                   | -                      | -                                      | -                              | +                       | ?                   |
| AF-DABIG-VKA-JAPAN | 2, 15, 16                        | ?                   | ?                      | ?                                      | ?                              | ?                       | ?                   |
| AF-EDOX-VKA-ASIA   | 1, 21, 23                        | +                   | +                      | -                                      | +                              | +                       | +                   |
| AF-EDOX-VKA-JAPAN  | 2, 21, 22, 23                    | +                   | ?                      | -                                      | ?                              | +                       | +                   |
| AF-EDOX-VKA-MULTI  | 1, 21, 23, 24, 25                | +                   | +                      | -                                      | ?                              | +                       | +                   |
| AF-VKA-ASA-CHINA   | 1, 5                             | +                   | ?                      | ?                                      | ?                              | ?                       | ?                   |
| ARISTOTLE          | 1, 13                            | +                   | ?                      | +                                      | +                              | +                       | +                   |
| ARISTOTLE-J        | 1, 12, 13                        | ?                   | ?                      | -                                      | +                              | +                       | +                   |
| AVERROES           | 4, 13                            | +                   | +                      | +                                      | +                              | +                       | +                   |
| BAFTA              | 1, 4                             | +                   | +                      | -                                      | +                              | +                       | +                   |
| Chinese ATAFS      | 2, 5                             | ?                   | ?                      | ?                                      | ?                              | +                       | ?                   |
| ENGAGE AF-TIMI 48  | 1, 21, 23                        | +                   | +                      | +                                      | +                              | +                       | +                   |
| EXPLORE-Xa         | 1, 18, 19, 20                    | ?                   | ?                      | -                                      | +                              | +                       | +                   |
| J-ROCKET AF        | 2, 26                            | +                   | +                      | +                                      | ?                              | +                       | +                   |
| PATAF              | 1, 5                             | +                   | +                      | ?                                      | +                              | ?                       | +                   |
| PETRO              | 1, 6, 7, 8, 9 10, 11, 14, 16, 17 | ?                   | ?                      | -                                      | ?                              | +                       | +                   |
| RE-LY              | 1, 15, 16                        | +                   | +                      | -                                      | +                              | +                       | +                   |
| ROCKET AF          | 1, 27                            | +                   | +                      | +                                      | ?                              | +                       | +                   |
| SPAF II            | 1, 5                             | +                   | ?                      | -                                      | +                              | +                       | ?                   |
| WASPO              | 1, 5                             | +                   | +                      | -                                      | -                              | +                       | ?                   |

A5.2: Included trials and risk of bias assessment for ischaemic stroke

| Study             | Interventions compared | Sequence generation | Allocation concealment | Blinding of participants and personnel | Blinding of outcome assessment | Incomplete outcome data | Selective reporting |
|-------------------|------------------------|---------------------|------------------------|----------------------------------------|--------------------------------|-------------------------|---------------------|
| ACTIVE W          | 1, 4                   | +                   | +                      | -                                      | +                              | +                       | ?                   |
| AFASAK II         | 1, 5                   | +                   | ?                      | -                                      | +                              | +                       | ?                   |
| AF-ASA-VKA-CHINA  | 2, 4                   | ?                   | -                      | -                                      | -                              | +                       | ?                   |
| AF-VKA-ASA-CHINA  | 1, 5                   | +                   | ?                      | ?                                      | ?                              | ?                       | ?                   |
| ARISTOTLE         | 1, 13                  | +                   | ?                      | +                                      | +                              | +                       | +                   |
| ARISTOTLE-J       | 1, 12, 13              | ?                   | ?                      | -                                      | +                              | +                       | +                   |
| AVERROES          | 4, 13                  | +                   | +                      | +                                      | +                              | +                       | +                   |
| ENGAGE AF-TIMI 48 | 1, 21, 23              | +                   | +                      | +                                      | +                              | +                       | +                   |
| EXPLORE-Xa        | 1, 18, 19, 20          | ?                   | ?                      | -                                      | +                              | +                       | +                   |
| J-ROCKET AF       | 2, 26                  | +                   | +                      | +                                      | ?                              | +                       | +                   |
| PATAF             | 1, 5                   | +                   | +                      | ?                                      | +                              | ?                       | +                   |
| RE-LY             | 1, 15, 16              | +                   | +                      | -                                      | +                              | +                       | +                   |
| ROCKET AF         | 1, 27                  | +                   | +                      | +                                      | ?                              | +                       | +                   |
| SPAF II           | 1, 5                   | +                   | ?                      | -                                      | +                              | +                       | ?                   |

### A5.3: Included trials and risk of bias assessment for myocardial infarction

| Study             | Interventions compared | Sequence generation | Allocation concealment | Blinding of participants and personnel | Blinding of outcome assessment | Incomplete outcome data | Selective reporting |
|-------------------|------------------------|---------------------|------------------------|----------------------------------------|--------------------------------|-------------------------|---------------------|
| ACTIVE W          | 1, 4                   | +                   | +                      | -                                      | +                              | +                       | ?                   |
| AFASAK II         | 1, 5                   | +                   | ?                      | -                                      | +                              | +                       | ?                   |
| AF-ASA-VKA-CHINA  | 2, 4                   | ?                   | -                      | -                                      | -                              | +                       | ?                   |
| AF-EDOX-VKA-MULTI | 1, 21, 23, 24, 25      | +                   | +                      | -                                      | ?                              | +                       | +                   |
| ARISTOTLE         | 1, 13                  | +                   | ?                      | +                                      | +                              | +                       | +                   |
| ARISTOTLE-J       | 1, 12, 13              | ?                   | ?                      | -                                      | +                              | +                       | +                   |
| AVERROES          | 4, 13                  | +                   | +                      | +                                      | +                              | +                       | +                   |
| BAFTA             | 1, 4                   | +                   | +                      | -                                      | +                              | +                       | +                   |
| ENGAGE AF-TIMI 48 | 1, 21, 23              | +                   | +                      | +                                      | +                              | +                       | +                   |
| EXPLORE-Xa        | 1, 18, 19, 20          | ?                   | ?                      | -                                      | +                              | +                       | +                   |
| J-ROCKET AF       | 2, 26                  | +                   | +                      | +                                      | ?                              | +                       | +                   |
| PATAF             | 1, 5                   | +                   | +                      | ?                                      | +                              | ?                       | +                   |
| RE-LY             | 1, 15, 16              | +                   | +                      | -                                      | +                              | +                       | +                   |
| ROCKET AF         | 1, 27                  | +                   | +                      | +                                      | ?                              | +                       | +                   |
| SPAF II           | 1, 5                   | +                   | ?                      | -                                      | -                              | +                       | ?                   |

#### A5.4: Included trials and risk of bias assessment for all-cause mortality

| Study             | Interventions compared | Sequence generation | Allocation concealment | Blinding of participants and personnel | Blinding of outcome assessment | Incomplete outcome data | Selective reporting |
|-------------------|------------------------|---------------------|------------------------|----------------------------------------|--------------------------------|-------------------------|---------------------|
| ACTIVE W          | 1, 4                   | +                   | +                      | -                                      | +                              | +                       | ?                   |
| AFASAK            | 1, 4                   | +                   | +                      | -                                      | ?                              | +                       | ?                   |
| AFASAK II         | 1, 5                   | +                   | ?                      | -                                      | +                              | +                       | ?                   |
| AF-ASA-VKA-CHINA  | 2, 4                   | ?                   | -                      | -                                      | -                              | +                       | ?                   |
| AF-VKA-ASA-CHINA  | 1, 5                   | +                   | ?                      | -                                      | ?                              | ?                       | ?                   |
| ARISTOTLE         | 1, 13                  | +                   | ?                      | +                                      | +                              | +                       | +                   |
| ARISTOTLE-J       | 1, 12, 13              | ?                   | ?                      | -                                      | +                              | +                       | +                   |
| AVERROES          | 4, 13                  | +                   | +                      | +                                      | +                              | +                       | +                   |
| BAFTA             | 1, 4                   | +                   | +                      | -                                      | +                              | +                       | +                   |
| Chinese ATAFS     | 2, 5                   | ?                   | ?                      | ?                                      | ?                              | +                       | ?                   |
| ENGAGE AF-TIMI 48 | 1, 21, 23              | +                   | +                      | +                                      | +                              | +                       | +                   |
| EXPLORE-Xa        | 1, 18, 19, 20          | ?                   | ?                      | -                                      | +                              | +                       | +                   |
| J-ROCKET AF       | 2, 26                  | +                   | +                      | +                                      | ?                              | +                       | +                   |
| PATAF             | 1, 5                   | +                   | +                      | ?                                      | +                              | ?                       | +                   |
| RE-LY             | 1, 15, 16              | +                   | +                      | -                                      | +                              | +                       | +                   |
| ROCKET AF         | 1, 27                  | +                   | +                      | +                                      | +                              | +                       | +                   |
| SPAF II           | 1, 5                   | +                   | ?                      | -                                      | -                              | +                       | ?                   |
| WASPO             | 1, 5                   | +                   | +                      | -                                      | -                              | +                       | ?                   |

## A5.5: Included trials and risk of bias assessment for major bleeding

| Study              | Interventions compared           | Sequence generation | Allocation concealment | Blinding of participants and personnel | Blinding of outcome assessment | Incomplete outcome data | Selective reporting |
|--------------------|----------------------------------|---------------------|------------------------|----------------------------------------|--------------------------------|-------------------------|---------------------|
| ACTIVE W           | 1, 4                             | +                   | +                      | -                                      | +                              | +                       | ?                   |
| AFASAK II          | 1, 5                             | +                   | ?                      | -                                      | +                              | +                       | ?                   |
| AF-ASA-VKA-CHINA   | 2, 4                             | ?                   | -                      | -                                      | -                              | +                       | ?                   |
| AF-DABIG-VKA-JAPAN | 2, 15, 16                        | ?                   | ?                      | ?                                      | ?                              | ?                       | ?                   |
| AF-EDOX-VKA-ASIA   | 1, 21, 23                        | +                   | +                      | -                                      | +                              | +                       | +                   |
| AF-EDOX-VKA-JAPAN  | 2, 21, 22, 23                    | +                   | ?                      | -                                      | ?                              | +                       | +                   |
| AF-EDOX-VKA-MULTI  | 1, 21, 23, 24, 25                | +                   | +                      | -                                      | +                              | +                       | +                   |
| AF-VKA-ASA-CHINA   | 1, 5                             | +                   | ?                      | -                                      | ?                              | ?                       | ?                   |
| ARISTOTLE          | 1, 13                            | +                   | ?                      | +                                      | +                              | ?                       | +                   |
| ARISTOTLE-J        | 1, 12, 13                        | ?                   | ?                      | -                                      | +                              | +                       | +                   |
| AVERROES           | 4, 13                            | +                   | +                      | +                                      | +                              | +                       | +                   |
| BAFTA              | 1, 4                             | +                   | +                      | -                                      | +                              | +                       | +                   |
| ENGAGE AF-TIMI 48  | 1, 21, 23                        | +                   | +                      | +                                      | +                              | +                       | +                   |
| EXPLORE-Xa         | 1, 18, 19, 20                    | ?                   | ?                      | -                                      | +                              | +                       | +                   |
| PETRO              | 1, 6, 7, 8, 9 10, 11, 14, 16, 17 | ?                   | ?                      | -                                      | +                              | +                       | +                   |
| RE-LY              | 1, 15, 16                        | +                   | +                      | -                                      | +                              | +                       | +                   |
| ROCKET AF          | 1, 27                            | +                   | +                      | +                                      | ?                              | +                       | +                   |
| WASPO              | 1, 5                             | +                   | +                      | -                                      | -                              | +                       | ?                   |

## A5.6: Included trials and risk of bias assessment for intracranial bleeding

| Study             | Interventions compared | Sequence generation | Allocation concealment | Blinding of participants and personnel | Blinding of outcome assessment | Incomplete outcome data | Selective reporting |
|-------------------|------------------------|---------------------|------------------------|----------------------------------------|--------------------------------|-------------------------|---------------------|
| AFASAK II         | 1, 5                   | +                   | ?                      | -                                      | +                              | +                       | ?                   |
| ARISTOTLE         | 1, 13                  | +                   | ?                      | +                                      | +                              | ?                       | +                   |
| AVERROES          | 4, 13                  | +                   | +                      | +                                      | +                              | +                       | +                   |
| ENGAGE AF-TIMI 48 | 1, 21, 23              | +                   | +                      | +                                      | +                              | +                       | +                   |
| RE-LY             | 1, 15, 16              | +                   | +                      | -                                      | +                              | +                       | +                   |
| J-ROCKET AF       | 2, 26                  | +                   | +                      | +                                      | ?                              | +                       | +                   |
| ROCKET AF         | 1, 27                  | +                   | +                      | +                                      | ?                              | +                       | +                   |
| SPAF II           | 1, 5                   | +                   | ?                      | -                                      | -                              | +                       | ?                   |

### A5.7: Included trials and risk of bias assessment for clinically relevant bleeding

| Study              | Interventions compared           | Sequence generation | Allocation concealment | Blinding of participants and personnel | Blinding of outcome assessment | Incomplete outcome data | Selective reporting |
|--------------------|----------------------------------|---------------------|------------------------|----------------------------------------|--------------------------------|-------------------------|---------------------|
| AF-DABIG-VKA-JAPAN | 2, 15, 16                        | ?                   | ?                      | ?                                      | ?                              | ?                       | ?                   |
| AF-EDOX-VKA-ASIA   | 1, 21, 23                        | +                   | +                      | -                                      | +                              | +                       | +                   |
| AF-EDOX-VKA-JAPAN  | 2, 21, 22, 23                    | +                   | ?                      | -                                      | ?                              | +                       | +                   |
| AF-EDOX-VKA-MULTI  | 1, 21, 23, 24, 25                | +                   | +                      | -                                      | +                              | +                       | +                   |
| ARISTOTLE          | 1, 13                            | +                   | ?                      | +                                      | +                              | ?                       | +                   |
| ARISTOTLE-J        | 1, 12, 13                        | ?                   | ?                      | -                                      | +                              | +                       | +                   |
| AVERROES           | 4, 13                            | +                   | +                      | +                                      | +                              | +                       | +                   |
| ENGAGE AF-TIMI 48  | 1, 21, 23                        | +                   | +                      | +                                      | +                              | +                       | +                   |
| EXPLORE-Xa         | 1, 18, 19, 20                    | ?                   | ?                      | -                                      | +                              | +                       | +                   |
| J-ROCKET AF        | 2, 26                            | +                   | +                      | +                                      | ?                              | +                       | +                   |
| PETRO              | 1, 6, 7, 8, 9 10, 11, 14, 16, 17 | ?                   | ?                      | -                                      | +                              | +                       | +                   |
| ROCKET AF          | 1, 27                            | +                   | +                      | +                                      | ?                              | +                       | +                   |
