# Supplementary material for: Oral anticoagulants for prevention of stroke in atrial fibrillation: systematic review, network meta-analysis, and cost effectiveness analysis
Source: PubMed Central journal article supplement (PMC5704695; doi:10.1136/bmj.j5058), 2017-11-28
Supplement: lopj038668.ww6.pdf [file lopj038668.ww6.pdf]

## Appendix 6: Effect modifiers examined in stroke prevention in AF

| Study              | Intervention                                                                    | Mean time in therapeutic range (INR)        | Mean age (years) | Percentage of males | Mean CHADS2 score |
|--------------------|---------------------------------------------------------------------------------|---------------------------------------------|------------------|---------------------|-------------------|
| ACTIVE W           | Antiplatelet (Clopidogrel 75mg + (aspirin 75-100mg) od                          | NA                                          | 70.2             | 67                  | 2                 |
| ACTIVE W           | Warfarin (INR 2-3, some patients may have received other vitamin K antagonists) | 63.8%                                       | 70.2             | 66                  | 2                 |
| AFASAK             | Warfarin (INR 2-3)                                                              | 73%                                         | 72.8             | 53                  | NR                |
| AFASAK             | Aspirin 75mg od                                                                 | NA                                          | 75.1             | 55                  | NR                |
| AFASAK II          | Aspirin 300mg od                                                                | NA                                          | 73.1             | 65                  | NR                |
| AFASAK II          | Warfarin (INR 2-3)                                                              | 73%                                         | 73.2             | 57                  | NR                |
| AF-ASA-VKA-CHINA   | Warfarin (INR 1.6-2.5)                                                          | NR                                          | 60.8             | 2.9                 | NR                |
| AF-ASA-VKA-CHINA   | Aspirin 100mg od                                                                | NA                                          | 60               | 2.8                 | NR                |
| AF-DABIG-VKA-JAPAN | Dabigatran 110mg bd                                                             | NA                                          | NR               | NR                  | NR                |
| AF-DABIG-VKA-JAPAN | Dabigatran 150mg bd                                                             | NA                                          | NR               | NR                  | NR                |
| AF-DABIG-VKA-JAPAN | Warfarin (INR 2-3, $\geq 1.6$ to $\leq 2.6$ in $\geq 70$ yrs)                   | NR                                          | NR               | NR                  | NR                |
| AF-EDOX-VKA-ASIA   | Edoxaban 30mg od                                                                | NA                                          | 64.9             | 64.6                | 2                 |
| AF-EDOX-VKA-ASIA   | Edoxaban 60mg od                                                                | NA                                          | 65.9             | 68.8                | 1.9               |
| AF-EDOX-VKA-ASIA   | Warfarin (INR 2-3)                                                              | 45.1%                                       | 64.5             | 62.7                | 1.8               |
| AF-EDOX-VKA-JAPAN  | Edoxaban 30mg od                                                                | NA                                          | 69.4             | 84                  | 1.9               |
| AF-EDOX-VKA-JAPAN  | Edoxaban 45mg od                                                                | NA                                          | 69.5             | 81.3                | 2.1               |
| AF-EDOX-VKA-JAPAN  | Edoxaban 60mg od                                                                | NA                                          | 68.4             | 81.7                | 2.1               |
| AF-EDOX-VKA-JAPAN  | Warfarin (INR 2-3, 1.6-2.6 in $\geq 70$ yrs.)                                   | 83% ( $\geq 70$ yrs.)<br>73% ( $< 70$ yrs.) | 68.8             | 82.9                | 2.2               |
| AF-EDOX-VKA-MULTI  | Edoxaban 30mg od                                                                | NA                                          | 65.2             | 59.6                | 3.12              |
| AF-EDOX-VKA-MULTI  | Edoxaban 30mg bd                                                                | NA                                          | 64.8             | 61.5                | 3.1               |
| AF-EDOX-VKA-MULTI  | Edoxaban 60mg od                                                                | NA                                          | 64.9             | 66.2                | 3.06              |
| AF-EDOX-VKA-MULTI  | Edoxaban 60mg bd                                                                | NA                                          | 64.7             | 63.3                | 3.06              |
| AF-EDOX-VKA-MULTI  | Warfarin (INR 2-3)                                                              | 49.7%                                       | 66               | 60.4                | 3.03              |
| AF-VKA-ASA-CHINA   | Warfarin (INR 2.1-2.5)                                                          | NR                                          | 66.8             | 63.2                | NR                |
| AF-VKA-ASA-CHINA   | Aspirin 200mg od                                                                | NA                                          | 67.6             | 59.2                | NR                |

| <b>Study</b>      | <b>Intervention</b>                                                                               | <b>Mean time in therapeutic range (INR)</b> | <b>Mean age (years)</b> | <b>Percentage of males</b> | <b>Mean CHADS2 score</b> |
|-------------------|---------------------------------------------------------------------------------------------------|---------------------------------------------|-------------------------|----------------------------|--------------------------|
| ARISTOTLE         | Apixaban 5mg bd                                                                                   | NA                                          | 70                      | 64.5                       | 2.1                      |
| ARISTOTLE         | Warfarin (INR 2-3)                                                                                | 62.2%                                       | 70                      | 65                         | 2.1                      |
| ARISTOTLE-J       | Apixaban 2.5mg bd                                                                                 | NA                                          | 69.3                    | 85.1                       | 1.8                      |
| ARISTOTLE-J       | Apixaban 5mg bd                                                                                   | NA                                          | 70                      | 82.4                       | 2.1                      |
| ARISTOTLE-J       | Warfarin (INR 2-3, 2-2.6 in $\geq 70$ yrs.)                                                       | 60%                                         | 71.7                    | 81.1                       | 1.9                      |
| AVERROES          | Apixaban 5mg bd                                                                                   | NA                                          | 70                      | 59                         | 2                        |
| AVERROES          | Aspirin 81-324mg od                                                                               | NA                                          | 70                      | 58                         | 2.1                      |
| BAFTA             | Aspirin 75mg od                                                                                   | NA                                          | 81.5                    | 54                         | 2.33                     |
| BAFTA             | Warfarin (INR 2-3)                                                                                | 67%                                         | 81.5                    | 55                         | 2.34                     |
| Chinese ATAFS     | Warfarin (INR 2-3, 1.6-2.5 in $>75$ yrs.)                                                         | NR                                          | NR                      | NR                         | NR                       |
| Chinese ATAFS     | Aspirin 150-160mg od                                                                              | NA                                          | NR                      | NR                         | NR                       |
| ENGAGE AF-TIMI 48 | Edoxaban 30mg od                                                                                  | NA                                          | 72                      | 62.5                       | 2.8                      |
| ENGAGE AF-TIMI 48 | Edoxaban 60mg od                                                                                  | NA                                          | 72                      | 62.1                       | 2.8                      |
| ENGAGE AF-TIMI 48 | Warfarin (INR 2-3)                                                                                | 64.9%                                       | 72                      | 61.2                       | 2.8                      |
| EXPLORE-Xa        | Betrixaban 40mg od                                                                                | NA                                          | 73.3                    | 62.2                       | 2.59                     |
| EXPLORE-Xa        | Betrixaban 60mg od                                                                                | NA                                          | 73.8                    | 63.8                       | 2.48                     |
| EXPLORE-Xa        | Betrixaban 80mg od                                                                                | NA                                          | 72                      | 70.1                       | 2.06                     |
| EXPLORE-Xa        | Warfarin (INR 2-3)                                                                                | 63.4%                                       | 72.7                    | 70.1                       | 2.51                     |
| J-ROCKET AF       | Rivaroxaban 15mg od                                                                               | NA                                          | 71                      | 82.9                       | 3.27                     |
| J-ROCKET AF       | Warfarin (INR 2-3, 1.6-2.6 in $\geq 70$ yrs.)                                                     | 65%                                         | 71.2                    | 78.2                       | 3.22                     |
| PATAF             | Aspirin 150mg od                                                                                  | NA                                          | 70.8                    | 48                         | NR                       |
| PATAF             | Dicoumarol (INR 2.5-3.5, some patients received other coumarins – phenprocoumon or acenocoumarol) | NR                                          | 70                      | 44                         | NR                       |
| PETRO             | Dabigatran 50mg bd                                                                                | NA                                          | 70                      | 80                         | NR                       |
| PETRO             | Dabigatran 50mg + Aspirin 81mg bd                                                                 | NA                                          | NR                      | NR                         | NR                       |
| PETRO             | Dabigatran 50mg + Aspirin 325mg bd                                                                | NA                                          | NR                      | NR                         | NR                       |
| PETRO             | Dabigatran 150mg bd                                                                               | NA                                          | 70                      | 81.3                       | NR                       |
| PETRO             | Dabigatran 150mg + Aspirin 81mg bd                                                                | NA                                          | NR                      | NR                         | NR                       |

| <b>Study</b> | <b>Intervention</b>                 | <b>Mean time in therapeutic range (INR)</b> | <b>Mean age (years)</b> | <b>Percentage of males</b> | <b>Mean CHADS2 score</b> |
|--------------|-------------------------------------|---------------------------------------------|-------------------------|----------------------------|--------------------------|
| PETRO        | Dabigatran 150mg + Aspirin 325mg bd | NA                                          | NR                      | NR                         | NR                       |
| PETRO        | Dabigatran 300mg bd                 | NA                                          | 69.5                    | 82.6                       | NR                       |
| PETRO        | Dabigatran 300mg + Aspirin 81mg bd  | NA                                          | NR                      | NR                         | NR                       |
| PETRO        | Dabigatran 300mg + Aspirin 325mg bd | NA                                          | NR                      | NR                         | NR                       |
| PETRO        | Warfarin (INR 2-3)                  | 57.2%                                       | 69                      | 84.3                       | NR                       |
| RE-LY        | Dabigatran 110mg bd                 | NA                                          | 71.4                    | 64.3                       | 2.1                      |
| RE-LY        | Dabigatran 150mg bd                 | NA                                          | 71.5                    | 63.2                       | 2.2                      |
| RE-LY        | Warfarin (INR 2-3)                  | 64%                                         | 71.6                    | 63.3                       | 2.1                      |
| ROCKET AF    | Rivaroxaban 20mg od                 | NA                                          | 73                      | 60.3                       | 3.48                     |
| ROCKET AF    | Warfarin (INR 2-3)                  | 55%                                         | 73                      | 60.3                       | 3.46                     |
| SPAF II      | Warfarin (INR 2-4.5 in <75yrs.)     | NR                                          | 65                      | 75                         | NR                       |
| SPAF II      | Aspirin 325mg (in <75 yrs.)         | NA                                          | 64                      | 76                         | NR                       |
| SPAF II      | Warfarin (INR 2-4.5 in ≥75yrs.)     | NR                                          | 80                      | 59                         | NR                       |
| SPAF II      | Aspirin 325mg (in ≥75 yrs.)         | NA                                          | 80                      | 58                         | NR                       |
| WASPO        | Warfarin (INR 2-3)                  | 69.2%                                       | 83.5                    | 39                         | NR                       |
| WASPO        | Aspirin 300mg od                    | NA                                          | 82.6                    | 54                         | NR                       |

AF = atrial fibrillation; INR = international normalized ratio; NA; not applicable; NR = not reported, od = once daily; bd = twice daily, asp = aspirin
