# Supplementary material for: Oral anticoagulants for prevention of stroke in atrial fibrillation: systematic review, network meta-analysis, and cost effectiveness analysis
Source: PubMed Central journal article supplement (PMC5704695; doi:10.1136/bmj.j5058), 2017-11-28

Appendix 7: Incremental cost-effectiveness plane, relative to warfarin (INR 2-3) as reference

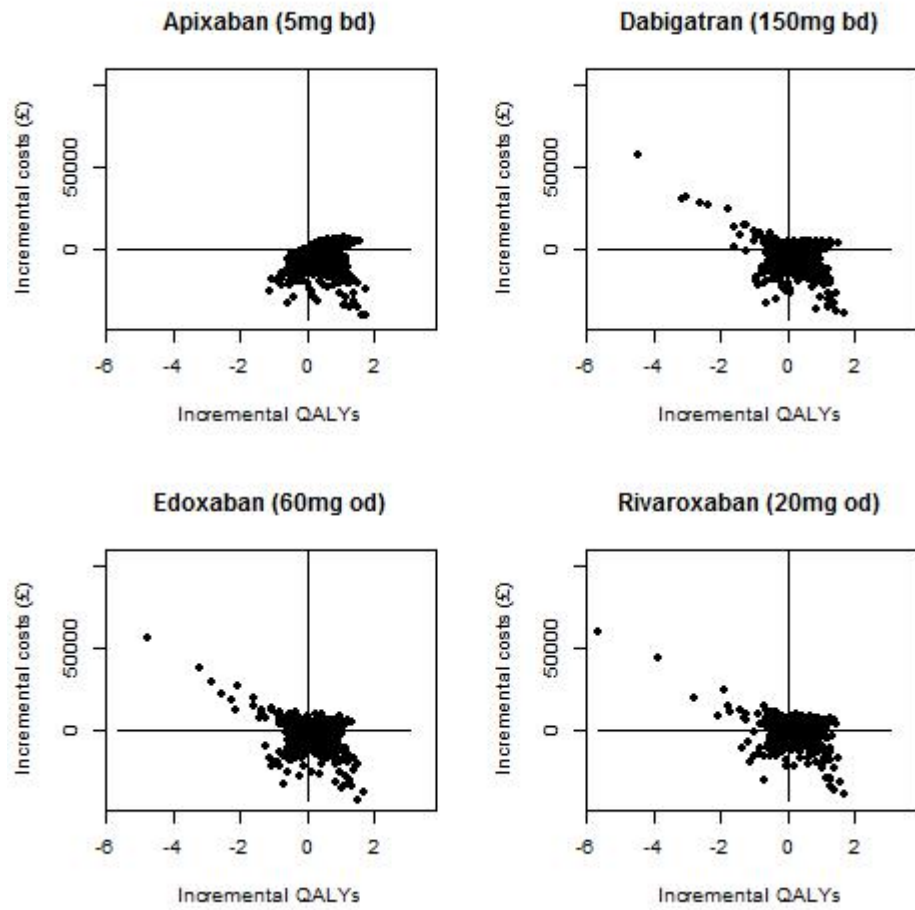

Supplement: lopj038668.ww7.pdf [file lopj038668.ww7.pdf]
